# Supplementary material
Source: MDPI journal article supplement (https://www.mdpi.com/1661-3821/3/1/2)
Supplement: s1 [file s1]

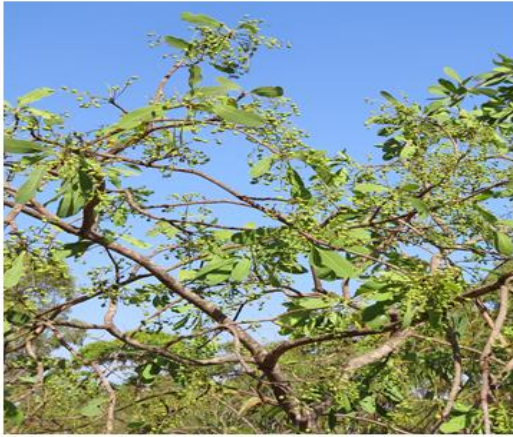

KP tree from Northern Territory

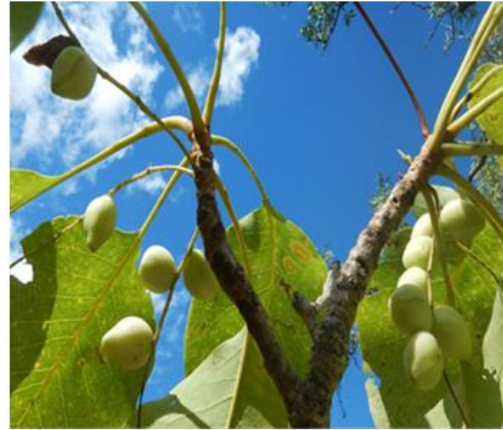

Northern Territory KP fruits

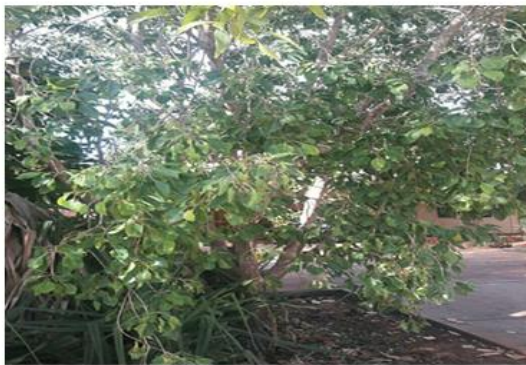

KP tree from Western Australia

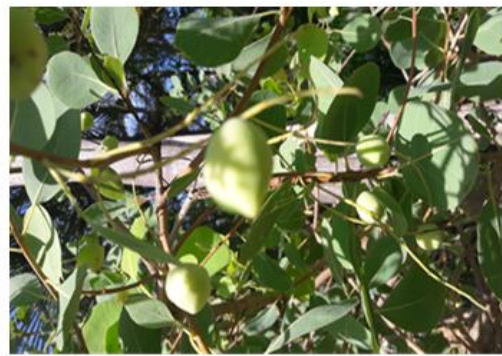

Western Australia KP fruits

Figure S1. *Terminalia ferdinandiana* (Kakadu plum).

(Note: photos were taken by Professor Yasmina Sultanbawa)
