# Supplementary material
Source: MDPI journal article supplement (https://www.mdpi.com/1661-3821/3/1/2)
Supplement: s1 [file s1]

Archive with 1 entries (1 files):
- nutraceuticals-1895708-supplementary.pdf
